# Supplementary material for: Rapid increase in summer surface ozone over the North China Plain during 2013–2019: a side effect of particulate matters reduction control?
Source: Copernicus journal article supplement (doi:10.5194/acp-2020-385), 2020-07-21
Supplement: Supplementary file [file acp-2020-385-AC3-supplement.pdf]

---

Dear Guy Brasseur Referee:

We are submitting the point-by-point responses to your comments. We thank you for comments  
5 and suggestions, and hope you are satisfied with our responses.

The major changes made in the revised version include:

1. Added related discussion about the role of heterogeneous chemistry in the revised  
10 manuscript.
2. Added more discussions on the role of the boundary layer and changing meteorology in O<sub>3</sub>  
trends.
3. Added a discussion on the HO<sub>x</sub> chemical source in the revised manuscript.

15

On behalf of the co-authors,

First Author: Xiaodan Ma

Corresponding Author: Jianping Huang

20

25

30

35

---

40 **Point-by-point responses to the Comments/Suggestions of Reviewer #3**

**Overview**

*The paper in its present form is clearly written and could be published after revisions. At this stage of the review process, I would like to add a few points and suggestions to be carefully addressed by the authors:*

45

**General comments**

1. *Since the focus of the paper is on the response of ozone to possible forcing processes, I wonder why so little is said about the role of heterogeneous chemistry. There is growing evidence that the increase in ozone is related to the increase in HO<sub>2</sub> due to the reduced scavenging of HO<sub>2</sub> by aerosols (PM) more than a change in the J-values. The paper highlights the change in the J(NO<sub>2</sub>) due reduced PM concentrations, but does not provide the quantitative response associated with the change in heterogenous processes. It would be important to discuss this aspect, even if no specific simulation of this effect has been done.*

50

55 Thanks for the reviewer's suggestion. According to recent researches, decrease in PM<sub>2.5</sub> was considered as one of the important causes leading to such an increase in surface O<sub>3</sub> mainly due to additional O<sub>3</sub> production associated with reduced sink of hydroperoxyl radicals (HO<sub>2</sub>) (Li et al., 2019). They pointed out that increase in surface O<sub>3</sub> associated with decrease in PM<sub>2.5</sub> was more prominent than that with reduction of NO<sub>x</sub> emissions over the NCP region where O<sub>3</sub> formation was dominated by VOC-limited regime. Liu and Wang (2020a, 2020b) found the reduction of PM emissions increased the O<sub>3</sub> levels by enhancing the photolysis rates and reducing heterogeneous uptake of reactive gases (mainly HO<sub>2</sub> and O<sub>3</sub>), of which the latter is more important than the former. However, the MM model does not include aqueous-phase chemistry that has been implemented in the 3D meteorology/chemistry models (e.g., Li et al., 60 2019; Liu and Wang, 2020a, 2020b). Thus, inclusion of detailed aerosol chemistry and observation-based uptake coefficients in a box model like MM is necessary to provide more accurate assessment of impact of aerosol radiative effect on surface O<sub>3</sub> change in the future.

60

65

We have included the related discussion about the role of heterogeneous chemistry both in the Introduction and Discussion part (See L92-98 and L407-413).

70

2. *A more convincing discussion must be provided regarding the role of the boundary layer, the changing meteorology (e.g., average cloudiness, precipitation, etc.) and the surface deposition processes. Some of these may not be explicitly treated in a box model, but should be discussed with appropriate references.*

75

Thanks for the comment. We agree with the reviewer that the boundary layer and the changes in other meteorological factors such as cloudiness, precipitation etc. played an important role in increase in surface O<sub>3</sub>. In fact, we have conducted two cases (cases F and G in Table 1) to assess the impact of the planetary boundary layer height (PBLH) on the change in surface O<sub>3</sub>. In addition, we have included two cases (i.e., E and G in Table 1) to investigate the impact of surface maximum air temperature on increase in surface O<sub>3</sub>. To highlight the reviewer's concern with the role of changing meteorology, we cited a relevant reference on this topic, "The

80

---

85 influence of changing meteorological factors on the change trend in surface O<sub>3</sub> may vary greatly  
with regions and time. In addition to air temperature and the boundary layer conditions, other  
meteorological factors such as cloud cover, precipitation, wind fields played an important role  
in driving the changes in surface O<sub>3</sub> observed in many places of China (e.g., Liu and Wang,  
2020a)” (see L416-420).

90 *3. There should be a discussion about the processes that have changed HO<sub>x</sub> chemistry (which  
affects the ozone production and loss) and this includes, for example, the HONO and  
formaldehyde photolysis.*

95 We agree with the reviewer that HO<sub>x</sub> chemistry is an important factor affecting the production  
and loss of O<sub>3</sub>. Now a statement with “The HONO photolysis as the primary production of OH  
radicals and the formaldehyde (HCHO) photolysis as the net radical source of HO<sub>2</sub> can lead to  
major changes in the HO<sub>x</sub> and NO<sub>x</sub> budget that may have an important effect on O<sub>3</sub> production  
and loss (e.g., Aumont et al., 2003; Brasseur et al., 2006; Lin et al., 2012)” is added on the  
revised version (see L174-179).

100

#### References:

105 Aumont, B., Chervier, F., and Laval, S.: Contribution of HONO sources to the NO<sub>x</sub>/HO<sub>x</sub>/O<sub>3</sub>  
chemistry in the polluted boundary layer, *Atmos. Environ.*, 37, 487-498, [https://doi.org/10.1016/S1352-2310\(02\)00920-2](https://doi.org/10.1016/S1352-2310(02)00920-2), 2003.

Brasseur, G. P., and Solomon, S.: *Aeronomy of the middle atmosphere: Chemistry and physics of the stratosphere and mesosphere*, Springer Science & Business Media, 2006.

110 Li, K., Jacob, D. J., Liao, H., Shen, L., and Bates, K. H.: Anthropogenic drivers of 2013-2017 trends  
in summer surface ozone in China, *National. Acad. Sciences.*, 116, 422-427,  
<https://doi.org/10.1073/pnas.1812168116>, 2019.

115 Lin, Y. C., Schwab, J., Demerjian, K., Bae, M.-S., Chen, W.-N., Sun, Y., Zhang, q., Hung, H.-M.,  
and Perry, J.: Summertime formaldehyde observations in New York City: Ambient levels, sources and  
its contribution to HO<sub>x</sub> radicals, *J. Geophys. Res.*, 117, D08305, <https://doi.org/10.1029/2011JD016504>,  
2012.

Liu, Y., and Wang, T.: Worsening urban ozone pollution in China from 2013 to 2017 – Part 2: The  
effects of emission changes and implications for multi-pollutant control, *Atmos. Chem. Phys. Discuss.*,  
2020, 1-27, [10.5194/acp-2020-53](https://doi.org/10.5194/acp-2020-53), 2020a.

120 Liu, Y., and Wang, T.: Worsening urban ozone pollution in China from 2013 to 2017 – Part 1: The  
complex and varying roles of meteorology, *Atmos. Chem. Phys.*, 20, 6305-6321,  
<https://doi.org/10.5194/acp-20-6305-2020>, 2020b.
